# Supplementary material
Source: PubMed Central journal article supplement (PMC3882504)
Supplement: mmc1.pdf [file mmc1.pdf]

## Supporting Information for

# Local partition coefficients govern solute permeability of cholesterol-containing membranes

*Florian Zocher<sup>1</sup>, David van der Spoel<sup>2,3</sup>, Peter Pohl<sup>1,\*</sup>, Jochen S. Hub<sup>4,\*</sup>*

<sup>1</sup>Institut für Biophysik, Johannes Kepler Universität, Gruberstraße 40, 4020 Linz, Austria,

<sup>2</sup>Department of Cell and Molecular Biology, Uppsala University, Box 596, SE-75124 Uppsala, Sweden,

<sup>3</sup>Science for Life Laboratory, Husargatan 3, 751 23 Uppsala, Sweden

<sup>4</sup>Institute for Microbiology and Genetics, Georg-August-University Göttingen,  
Justus-von-Liebig-Weg 11, 37077 Göttingen, Germany

\*To whom the correspondence should be addressed: [jhub@gwdg.de](mailto:jhub@gwdg.de) or [peter.pohl@jku.at](mailto:peter.pohl@jku.at)

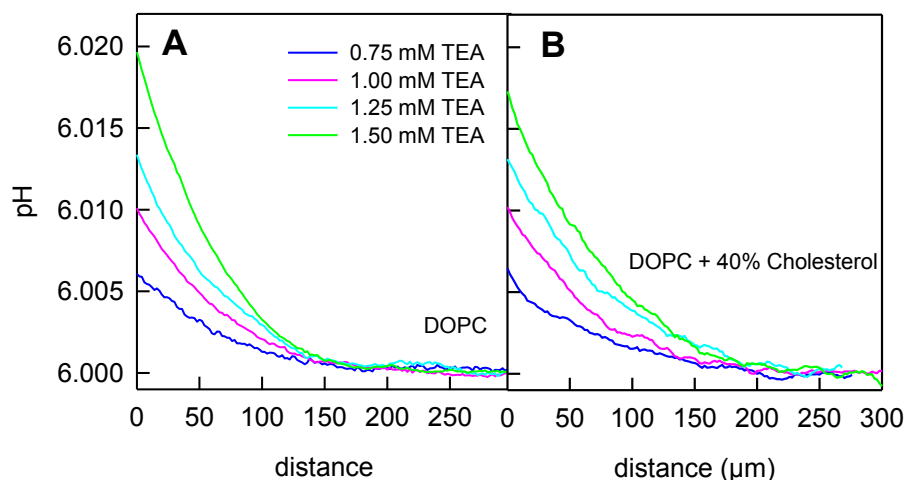

**Figure S1:** Representative pH profiles in the *trans* USL of a DOPC bilayer, which were induced by TEA added at the *cis* side of the membrane. The aqueous solutions contained 100 mM NaCl and 5 mM Mes (pH 7).

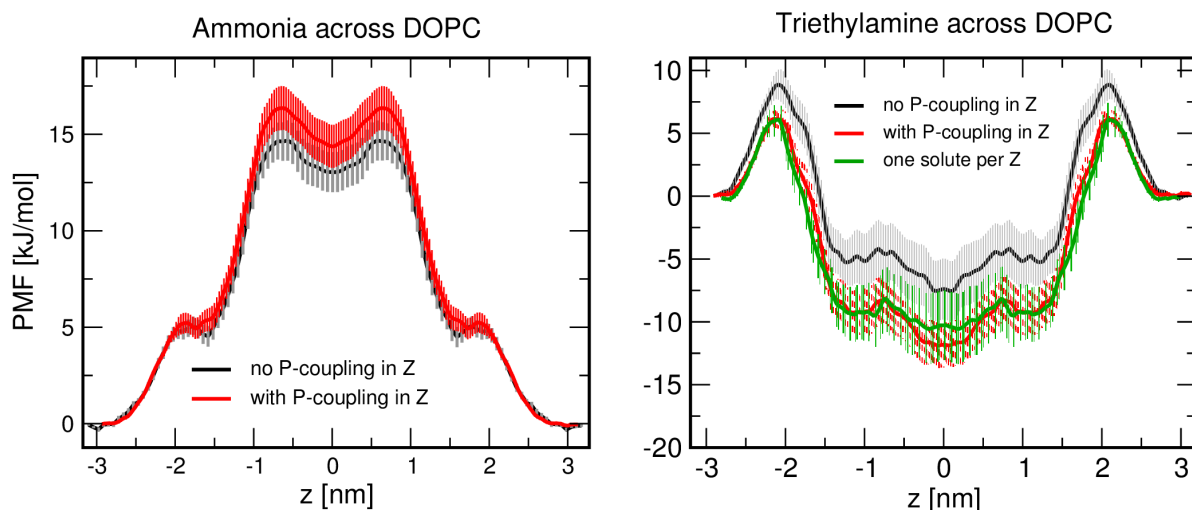

**Figure S2:** (A) Ammonia across DOPC: on the effect of pressure coupling in Z direction (membrane normal) during umbrella sampling simulations. The PMFs with pressure coupling in Z turned on (red) and off (black) agree within statistical errors. Error bars indicate one standard deviation. (B) TEA across DOPC: same analysis as in A. In addition, the umbrella simulation systems were set up with one TEA molecule per Z coordinate (instead of four, see Methods). Only marginal effects on the PMFs are found.

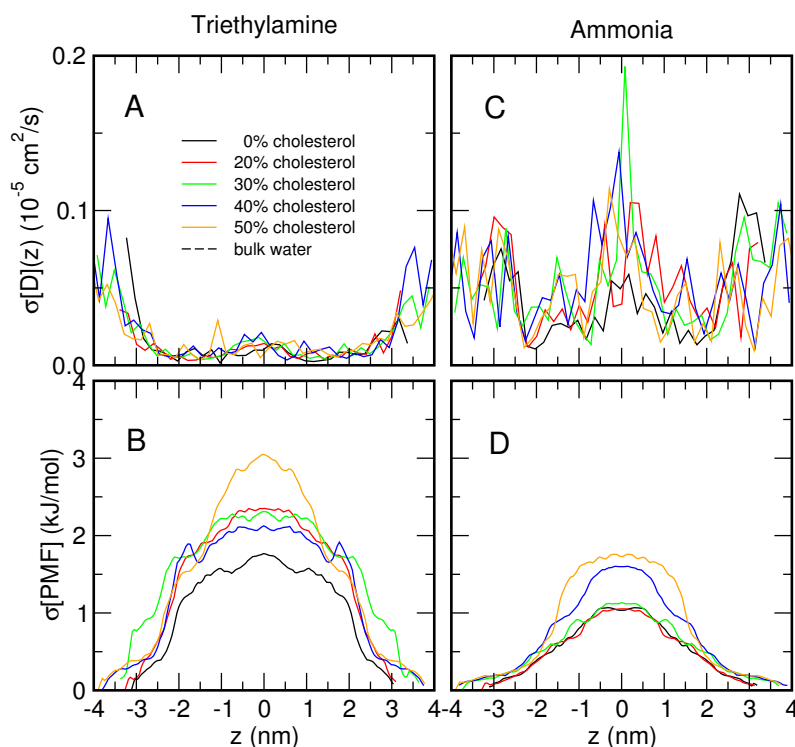

**Figure S3:** Statistical uncertainty shown as one standard deviation of the computed diffusion constants of (A) TEA and (C) ammonia shown in Figure 4 of the main text. Those uncertainties were computed from the standard deviation of diffusion constants of four independent solutes at each z position divided by  $(N-1)^{1/2}$ , where  $N=4$ . Thus, the estimate for the uncertainty is approximate but unbiased. (B/D) Uncertainty of the PMF computed using the Bayesian bootstrap of complete histograms [Hub et al., J. Chem. Theory Comput. 6, 3713-3720 (2010)]. The uncertainties of  $P_m$  (Fig. 3C/F) were computed from the uncertainties in A-D via Gaussian error propagation.

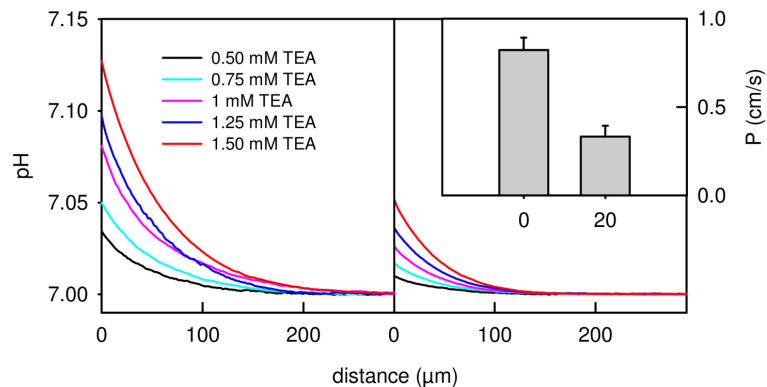

**Figure S4:** Representative pH profiles in the *trans* USL of a brain extract bilayer, which were induced by TEA added at the *cis* side of the membrane. Left: pure brain extract. Right: plus 20% cholesterol. Inset: TEA permeabilities at 0 and 20% cholesterol.

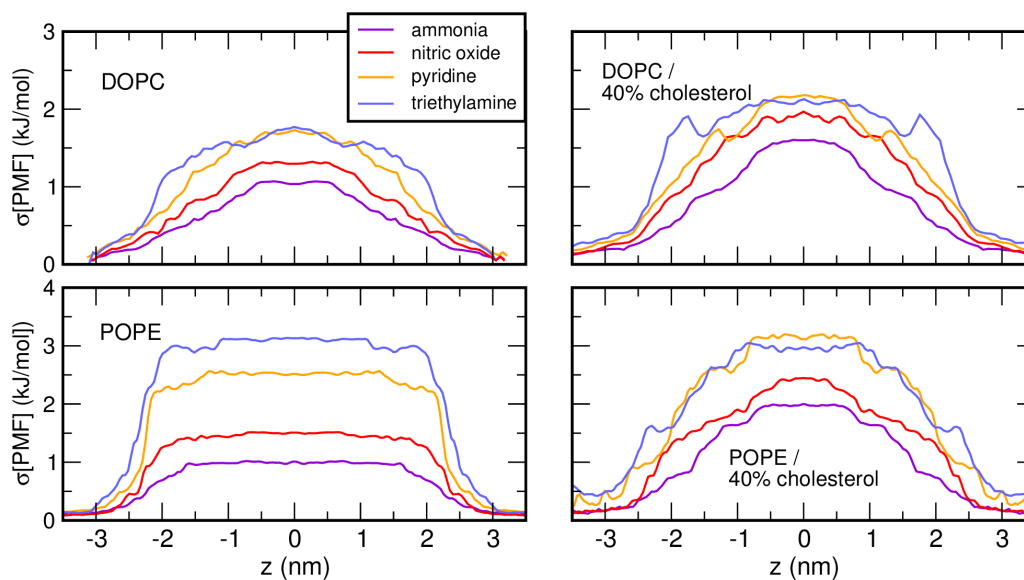

**Figure S5:** Statistical uncertainties (one standard deviation) of the PMFs shown as position dependent partition coefficients  $K(z)$  in Figure 6.  $\sigma_{\text{PMF}}(z)$  translates into the uncertainties of  $K(z)$  as a factor of  $\exp(-\sigma_{\text{PMF}}(z)/kT)$ . Uncertainties were computed using the Bayesian bootstrap of complete histograms [Hub et al., J. Chem. Theory Comput. 6, 3713-3720 (2010)].
